# Supplementary material for: Exploiting waste: towards a sustainable production of biodiesel using Musa acuminata peel ash as a heterogeneous catalyst
Source: Royal Society of Chemistry journal article supplement (doi:10.1039/c8gc00071a), 2018-01-01
Supplement: c8gc00071a1.pdf [file c8gc00071a1.pdf]

## Exploiting waste: Towards a sustainable production of biodiesel using *Musa acuminata* peel ash as a heterogeneous catalyst

Gunindra Pathak, Diparjun Das, Kalyani Rajkumari and Samuel Lalthazuala Rokhum\*

Department of Chemistry, National Institute of Technology Silchar, Silchar-10, Assam, India

\* Corresponding author. Tel.: +91 3842 242915; fax: +91 3842-224797; email address: [rokhum@che.nits.ac.in](mailto:rokhum@che.nits.ac.in)

### Table of content:

| Sl No | Content                                                 | Page No |
|-------|---------------------------------------------------------|---------|
| 1     | Oxidation stability graph of soybean oil biodiesel..... | S1      |
| 2     | XPS spectra of recovered catalyst.....                  | S2      |
| 3     | SEM and TEM images of recovered catalyst.....           | S3      |
| 4     | EDX spectrum of recovered ash catalyst.....             | S4      |
| 5     | XRD spectrum of recovered catalyst.....                 | S4      |

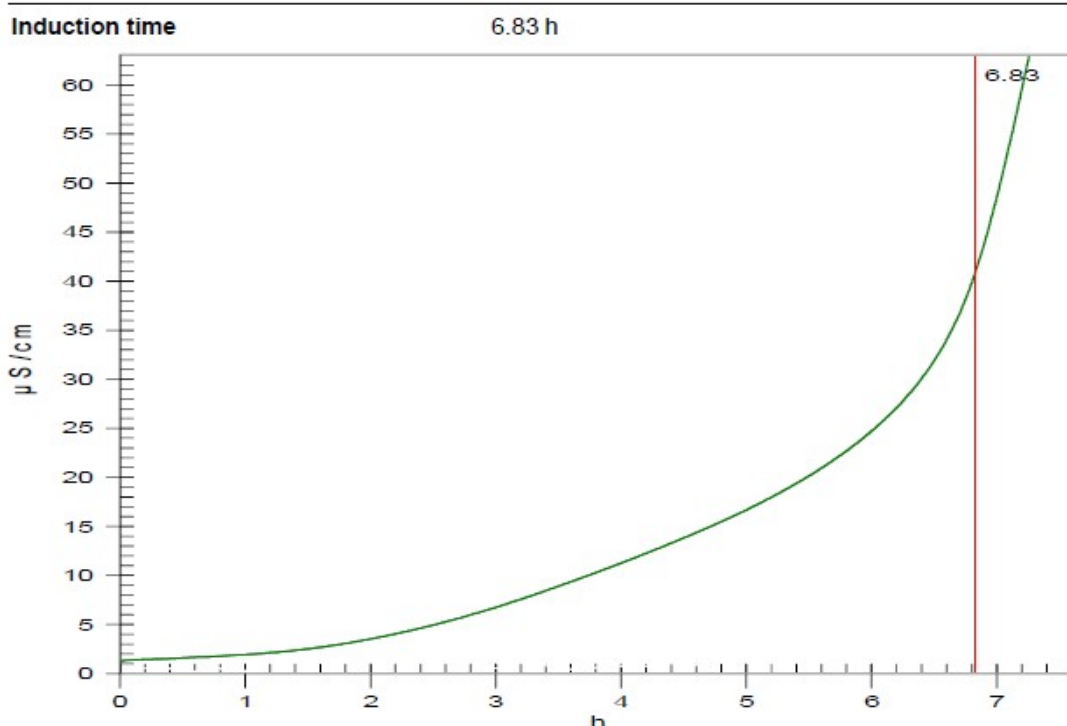

**Fig. 1:** Oxidation stability graph of soybean oil biodiesel.

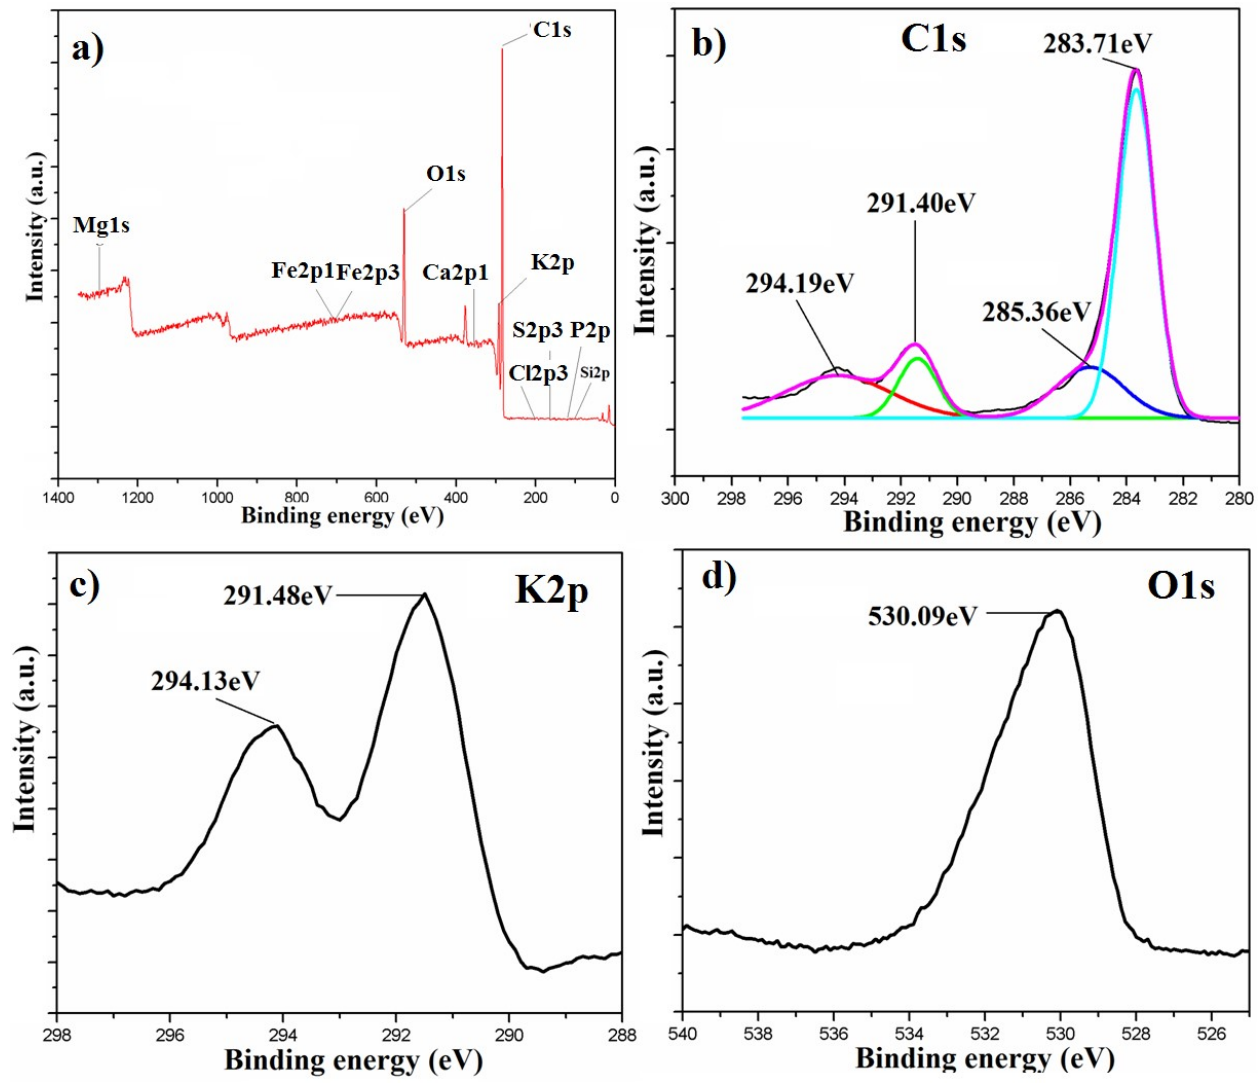

**Fig 2:** a) XPS survey spectrum, b) C1s, c) K2p, d) O1s spectra of *M. acuminata* ash catalyst after 4<sup>th</sup> cycle.

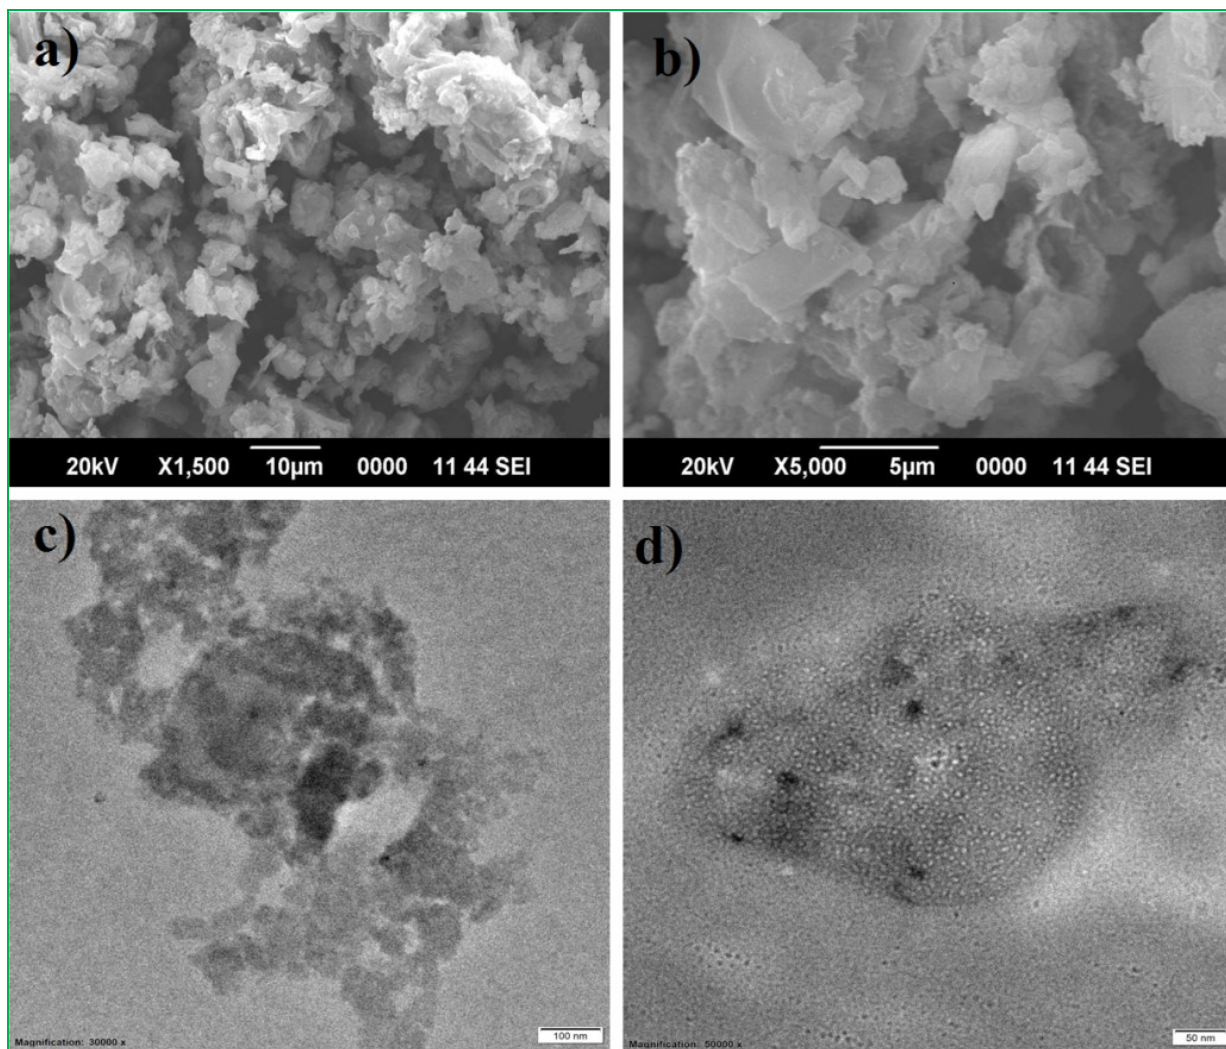

**Fig 3:** (a-b) SEM images, (c-d) TEM images of *M. acuminata* ash catalyst after 4<sup>th</sup> cycle.

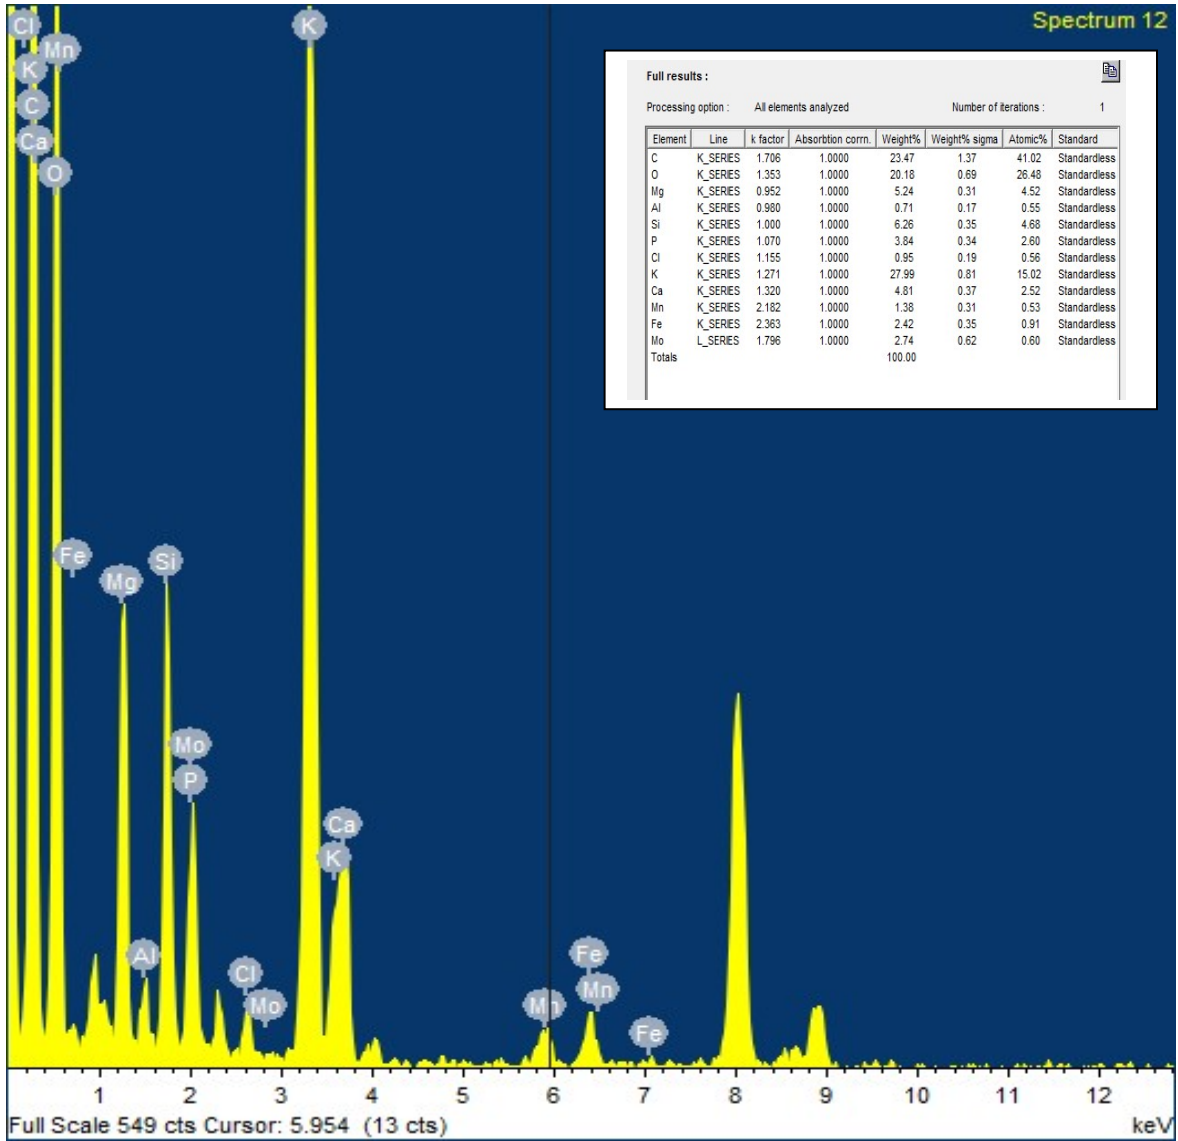

**Fig 4:** EDX spectrum of recovered ash catalyst after 4<sup>th</sup> cycle.

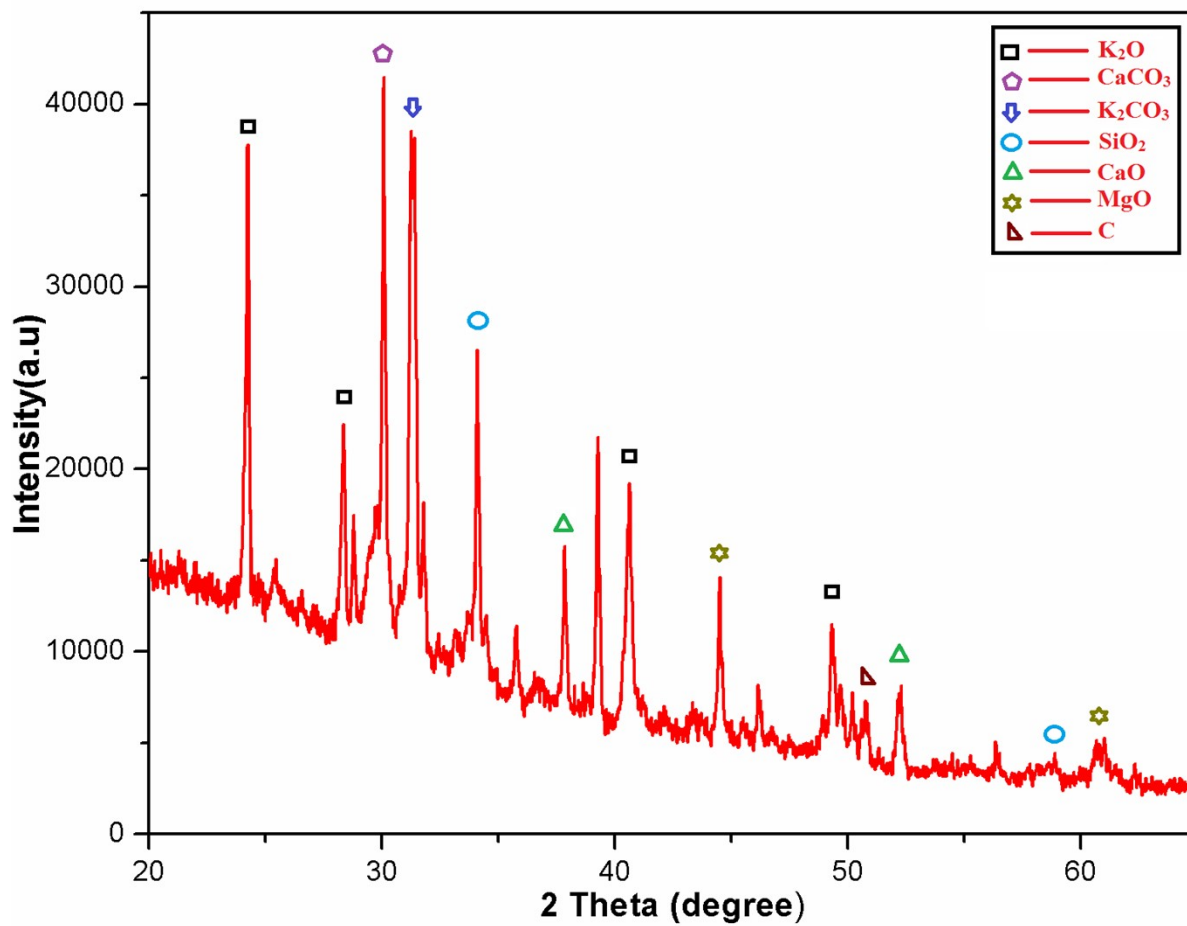

**Fig 3:** XRD spectrum of recovered *M. acuminata* ash catalyst after 4<sup>th</sup> cycle.
